# Supplementary material for: {GdIII7} and {GdIII14} Cluster Formation Based on a Rhodamine 6G Ligand with a Magnetocaloric Effect
Source: MDPI journal article supplement (doi:10.3390/molecules29020389), 2024-01-12
Supplement: s1 [file s1]

## Supporting Information

### **{Gd<sup>III</sup><sub>7</sub>} and {Gd<sup>III</sup><sub>14</sub>} clusters based on Rhodamine 6G ligand with magnetocaloric effect**

**Lin Miao <sup>1</sup>, Cai-Ming Liu <sup>2</sup> and Hui-Zhong Kou <sup>1,\*</sup>**

- 1 Department of Chemistry, Tsinghua University, Beijing 100084, P. R. China.
  - 2 Beijing National Laboratory for Molecular Sciences, Center for Molecular Science, Institute of Chemistry, Chinese Academy of Sciences, Beijing 100190, P. R. China.
- \* Correspondence: kouhz@mail.tsinghua.edu.cn (H.-Z.K.)

**Table S1.** Crystal data and refinement parameters for complexes **1** and **2**.

| Complex                                          | <b>1</b>                                                                          | <b>2</b>                                                                                |
|--------------------------------------------------|-----------------------------------------------------------------------------------|-----------------------------------------------------------------------------------------|
| Formula                                          | C <sub>236</sub> H <sub>288</sub> N <sub>37</sub> O <sub>51</sub> Gd <sub>7</sub> | C <sub>285</sub> H <sub>330.5</sub> N <sub>57.5</sub> O <sub>104</sub> Gd <sub>14</sub> |
| Formula weight                                   | 5559.77                                                                           | 8427.05                                                                                 |
| <i>T</i> / K                                     | 100                                                                               | 173                                                                                     |
| Crystal system                                   | monoclinic                                                                        | tetragonal                                                                              |
| Space group                                      | <i>P</i> 2 <sub>1</sub> /n                                                        | <i>P</i> 4/n                                                                            |
| <i>a</i> / Å                                     | 26.4695(2)                                                                        | 27.7525(9)                                                                              |
| <i>b</i> / Å                                     | 57.9994(6)                                                                        | 27.7525(9)                                                                              |
| <i>c</i> / Å                                     | 52.5818(6)                                                                        | 24.9438(7)                                                                              |
| $\alpha$ / °                                     | 90                                                                                | 90                                                                                      |
| $\beta$ / °                                      | 98.2830(10)                                                                       | 90                                                                                      |
| $\gamma$ / °                                     | 90                                                                                | 90                                                                                      |
| <i>V</i> / Å <sup>3</sup>                        | 79882.3(14)                                                                       | 19211.7(13)                                                                             |
| <i>Z</i>                                         | 12                                                                                | 2                                                                                       |
| $\rho_{\text{calc}}$ / g·cm <sup>-3</sup>        | 1.387                                                                             | 1.457                                                                                   |
| $\mu$ / mm <sup>-1</sup>                         | 11.692                                                                            | 16.005                                                                                  |
| F(000)                                           | 33828                                                                             | 8342                                                                                    |
| Radiation(CuK $\alpha$ )                         | CuK $\alpha$ ( $\lambda$ = 1.54184 Å)                                             | CuK $\alpha$ ( $\lambda$ = 1.54184 Å)                                                   |
| Data/restraints/parameters                       | 133115/66/7410                                                                    | 19020/78/1042                                                                           |
| GOF on <i>F</i> <sup>2</sup>                     | 1.073                                                                             | 0.981                                                                                   |
| <i>R</i> <sub>int</sub>                          | 0.0759                                                                            | 0.0921                                                                                  |
| <i>R</i> 1 [ <i>I</i> > 2 $\sigma$ ( <i>I</i> )] | 0.1210                                                                            | 0.0900                                                                                  |
| <i>R</i> 1, <i>wR</i> 2(all data)                | 0.3341                                                                            | 0.3012                                                                                  |
| CCDC                                             | 2322492                                                                           | 2322493                                                                                 |

**Table S2.** Selected bond distances (Å) and bond angles (°) for complex **1**.

|                                                     |            |                                                    |            |
|-----------------------------------------------------|------------|----------------------------------------------------|------------|
| Gd1-O1 ( $\mu_3$ -OH <sup>-</sup> )                 | 2.340(9)   | Gd1-O5 ( $\mu_3$ -CH <sub>3</sub> O <sup>-</sup> ) | 2.362(9)   |
| Gd1-O2 ( $\mu_3$ -OH <sup>-</sup> )                 | 2.358(9)   | Gd1-O6 ( $\mu_3$ -CH <sub>3</sub> O <sup>-</sup> ) | 2.387(9)   |
| Gd1-O3 ( $\mu_3$ -OH <sup>-</sup> )                 | 2.338(9)   | Gd1-O7 ( $\mu_3$ -CH <sub>3</sub> O <sup>-</sup> ) | 2.393(9)   |
| Gd1-O4 ( $\mu_3$ -OH <sup>-</sup> )                 | 2.316(9)   | Gd1-O8 ( $\mu_3$ -CH <sub>3</sub> O <sup>-</sup> ) | 2.404(6)   |
| Gd2-O3 ( $\mu_3$ -OH <sup>-</sup> )                 | 2.375(8)   | Gd2-O15 (NO <sub>3</sub> <sup>-</sup> )            | 2.503(11)  |
| Gd2-O5 ( $\mu_3$ -CH <sub>3</sub> O <sup>-</sup> )  | 2.311(9)   | Gd2-O19 ( $\mu_2$ -phO <sup>-</sup> )              | 2.342(9)   |
| Gd2-O6 ( $\mu_3$ -CH <sub>3</sub> O <sup>-</sup> )  | 2.461(9)   | Gd2-O20 (acyl oxygen)                              | 2.463(10)  |
| Gd2-O11 ( $\mu_2$ -CH <sub>3</sub> O <sup>-</sup> ) | 2.312(9)   | Gd2-N3                                             | 2.615(13)  |
| Gd2-O13 (NO <sub>3</sub> <sup>-</sup> )             | 2.485(10)  |                                                    |            |
| Gd3-O5 ( $\mu_3$ -CH <sub>3</sub> O <sup>-</sup> )  | 2.474(9)   | Gd3-O19 ( $\mu_2$ -phO <sup>-</sup> )              | 2.389(9)   |
| Gd3-O6 ( $\mu_3$ -CH <sub>3</sub> O <sup>-</sup> )  | 2.314(9)   | Gd3-O22 (phO <sup>-</sup> )                        | 2.229(9)   |
| Gd3-O10 ( $\mu_2$ -CH <sub>3</sub> O <sup>-</sup> ) | 2.298(10)  | Gd3-O23 (acyl oxygen)                              | 2.412(9)   |
| Gd3-N7                                              | 2.536(11)  | Gd3-O1 ( $\mu_3$ -OH <sup>-</sup> )                | 2.496(9)   |
| Gd4-O9 ( $\mu_2$ -CH <sub>3</sub> O <sup>-</sup> )  | 2.288(10)  | Gd4-O25 (phO <sup>-</sup> )                        | 2.189(10)  |
| Gd4-O10 ( $\mu_2$ -CH <sub>3</sub> O <sup>-</sup> ) | 2.261(10)  | Gd4-O2 ( $\mu_3$ -OH <sup>-</sup> )                | 2.331(9)   |
| Gd4-O26 (acyl oxygen)                               | 2.390(10)  | Gd4-N11                                            | 2.585(12)  |
| Gd4-O1 ( $\mu_3$ -OH <sup>-</sup> )                 | 2.315(9)   |                                                    |            |
| Gd5-O2 ( $\mu_3$ -OH <sup>-</sup> )                 | 2.384(9)   | Gd5-O16 (NO <sub>3</sub> <sup>-</sup> )            | 2.533(11)  |
| Gd5-O8 ( $\mu_3$ -CH <sub>3</sub> O <sup>-</sup> )  | 2.328(6)   | Gd5-O18 (NO <sub>3</sub> <sup>-</sup> )            | 2.470(12)  |
| Gd5-O9 ( $\mu_2$ -CH <sub>3</sub> O <sup>-</sup> )  | 2.298(10)  | Gd5-O29 ( $\mu_2$ -phO <sup>-</sup> )              | 2.342(9)   |
| Gd5-O7 ( $\mu_3$ -CH <sub>3</sub> O <sup>-</sup> )  | 2.507(9)   | Gd5-O28 (acyl oxygen)                              | 2.418(10)  |
| Gd5-N15                                             | 2.653(12)  |                                                    |            |
| Gd6-O7 ( $\mu_3$ -CH <sub>3</sub> O <sup>-</sup> )  | 2.314(9)   | Gd6-O31 (acyl oxygen)                              | 2.380(10)  |
| Gd6-O8 ( $\mu_3$ -CH <sub>3</sub> O <sup>-</sup> )  | 2.464(6)   | Gd6-O32 (phO <sup>-</sup> )                        | 2.218(11)  |
| Gd6-O12 ( $\mu_2$ -CH <sub>3</sub> O <sup>-</sup> ) | 2.283(10)  | Gd6-N19                                            | 2.511(12)  |
| Gd6-O29 ( $\mu_2$ -phO <sup>-</sup> )               | 2.433(9)   | Gd6-O4 ( $\mu_3$ -OH <sup>-</sup> )                | 2.505(9)   |
| Gd7-O4 ( $\mu_3$ -OH <sup>-</sup> )                 | 2.302(9)   | Gd7-O34 (phO <sup>-</sup> )                        | 2.257(10)  |
| Gd7-O11 ( $\mu_2$ -CH <sub>3</sub> O <sup>-</sup> ) | 2.267(9)   | Gd7-O35 (acyl oxygen)                              | 2.398(10)  |
| Gd7-O12 ( $\mu_2$ -CH <sub>3</sub> O <sup>-</sup> ) | 2.261(10)  | Gd7-N23                                            | 2.564(11)  |
| Gd7-O3 ( $\mu_3$ -OH <sup>-</sup> )                 | 2.336(8)   |                                                    |            |
| Gd1---Gd2                                           | 3.5577(8)  | Gd1---Gd3                                          | 3.5064(11) |
| Gd1---Gd5                                           | 3.5583(11) | Gd1---Gd6                                          | 3.5088(10) |
| Gd1---Gd4                                           | 3.808(11)  | Gd1---Gd7                                          | 3.797(11)  |
| Gd2---Gd3                                           | 3.5824(9)  | Gd6---Gd7                                          | 3.7832(7)  |
| Gd3---Gd4                                           | 3.7955(11) | Gd4---Gd5                                          | 3.7699(12) |

|             |           |             |           |
|-------------|-----------|-------------|-----------|
| Gd5---Gd6   | 3.611(12) | Gd2---Gd7   | 3.760(11) |
| Gd1-O2-Gd5  | 97.3(3)   | Gd4-O2-Gd1  | 108.6(4)  |
| Gd4-O2-Gd5  | 106.2(4)  | Gd1-O1-Gd3  | 92.9(3)   |
| Gd4-O1-Gd1  | 109.7(3)  | Gd4-O1-Gd3  | 104.1(3)  |
| Gd1-O3-Gd2  | 98.0(3)   | Gd7-O3-Gd1  | 108.6(3)  |
| Gd7-O3-Gd2  | 105.9(3)  | Gd7-O4-Gd6  | 103.7(3)  |
| Gd1-O4-Gd6  | 93.3(3)   | Gd7-O4-Gd1  | 110.6(4)  |
| Gd1-O5-Gd3  | 92.9(3)   | Gd1-O7-Gd5  | 93.1(3)   |
| Gd2-O5-Gd1  | 99.2(3)   | Gd1-O6-Gd2  | 94.4(3)   |
| Gd6-O7-Gd1  | 96.4(3)   | Gd2-O5-Gd3  | 96.9(3)   |
| Gd3-O6-Gd1  | 96.5(3)   | Gd6-O7-Gd5  | 96.9(3)   |
| Gd5-O8-Gd6  | 97.7(2)   | Gd3-O6-Gd2  | 97.2(3)   |
| Gd1-O8-Gd6  | 92.2(2)   | Gd5-O8-Gd1  | 97.5(2)   |
| Gd7-O11-Gd2 | 110.4(4)  | Gd7-O12-Gd6 | 112.8(4)  |
| Gd4-O9-Gd5  | 110.6(4)  | Gd4-O10-Gd3 | 112.8(4)  |
| Gd5-O29-Gd6 | 98.2(3)   | Gd2-O19-Gd3 | 98.4(3)   |
| O6-Gd3-N7   | 150.5(3)  | O2-Gd4-N11  | 136.5(3)  |
| O23-Gd3-O1  | 70.9(3)   | O2-Gd4-O26  | 74.1(3)   |
| O23-Gd3-O5  | 84.2(3)   | O1-Gd4-O2   | 70.8(3)   |
| O23-Gd3-N7  | 65.2(3)   | O1-Gd4-N11  | 152.7(3)  |
| O10-Gd3-O1  | 68.9(3)   | O1-Gd4-O26  | 139.3(3)  |
| O10-Gd3-O5  | 132.3(3)  | O9-Gd4-O2   | 72.1(3)   |
| O10-Gd3-O19 | 158.4(3)  | O9-Gd4-O1   | 101.2(3)  |
| O10-Gd3-O6  | 97.7(3)   | O9-Gd4-N11  | 91.2(4)   |
| O10-Gd3-O23 | 95.5(3)   | O9-Gd4-O26  | 86.8(3)   |
| O10-Gd3-N7  | 85.8(4)   | O10-Gd4-O2  | 92.4(3)   |
| O2-Gd5-N2   | 121.6(4)  | O7-Gd5-N2   | 158.3(4)  |
| O2-Gd5-N15  | 127.7(3)  | O7-Gd5-N15  | 87.0(3)   |
| O2-Gd5-O7   | 70.6(3)   | O7-Gd5-O16  | 144.7(3)  |
| O2-Gd5-O28  | 65.4(3)   | O8-Gd5-O2   | 76.9(3)   |
| O2-Gd5-O16  | 101.0(3)  | O8-Gd5-N2   | 135.3(3)  |
| O2-Gd5-O18  | 141.3(4)  | O8-Gd5-N15  | 132.7(3)  |
| N15-Gd5-N2  | 71.4(4)   | O8-Gd5-O7   | 61.9(3)   |
| O2-Gd1-O5   | 126.3(3)  | O8-Gd5-O29  | 68.7(3)   |
| O2-Gd1-O7   | 73.1(3)   | O8-Gd5-O28  | 131.2(3)  |
| O2-Gd1-O8   | 75.9(3)   | O8-Gd5-O16  | 151.7(3)  |
| O2-Gd1-O6   | 79.0(3)   | O8-Gd5-O18  | 115.5(3)  |
| O1-Gd1-O2   | 69.9(3)   | O29-Gd5-O2  | 140.5(3)  |
| O1-Gd1-O5   | 70.3(3)   | O29-Gd5-N2  | 96.8(4)   |
| O1-Gd1-O7   | 136.5(3)  | O29-Gd5-N15 | 69.9(3)   |
| O1-Gd1-O8   | 86.7(3)   | O29-Gd5-O7  | 76.3(3)   |
| O1-Gd1-O6   | 83.3(3)   | O29-Gd5-O28 | 126.7(3)  |
| O3-Gd1-O2   | 128.3(3)  | O29-Gd5-O16 | 118.5(3)  |

|             |          |             |          |
|-------------|----------|-------------|----------|
| O3-Gd1-O1   | 143.8(3) | O29-Gd5-O18 | 73.8(4)  |
| O3-Gd1-O5   | 74.6(3)  | O9-Gd5-O2   | 71.0(3)  |
| O3-Gd1-O7   | 78.4(3)  | O9-Gd5-N2   | 71.6(4)  |
| O3-Gd1-O8   | 125.6(3) | O9-Gd5-N15  | 142.8(3) |
| O3-Gd1-O6   | 72.4(3)  | O9-Gd5-O7   | 129.8(3) |
| O5-Gd1-O7   | 153.0(3) | O9-Gd5-O8   | 78.9(3)  |
| O5-Gd1-O8   | 135.0(3) | O9-Gd5-O29  | 118.7(3) |
| O5-Gd1-O6   | 61.9(3)  | O9-Gd5-O28  | 114.0(3) |
| O4-Gd1-O2   | 144.5(3) | O9-Gd5-O16  | 73.9(4)  |
| O4-Gd1-O1   | 115.5(3) | O9-Gd5-O18  | 75.7(4)  |
| O4-Gd1-O3   | 69.7(3)  | O28-Gd5-N2  | 92.0(4)  |
| O4-Gd1-O5   | 85.7(3)  | O28-Gd5-N15 | 63.7(3)  |
| O4-Gd1-O7   | 83.4(3)  | O28-Gd5-O7  | 76.7(3)  |
| O4-Gd1-O8   | 69.6(3)  | O28-Gd5-O16 | 68.9(4)  |
| O4-Gd1-O6   | 135.3(3) | O28-Gd5-O18 | 113.3(4) |
| O7-Gd1-O8   | 62.5(3)  | O16-Gd5-N2  | 25.2(4)  |
| O6-Gd1-O7   | 111.2(3) | O16-Gd5-N15 | 71.0(4)  |
| O6-Gd1-O8   | 154.9(3) | O18-Gd5-N2  | 25.0(4)  |
| O3-Gd2-O6   | 70.4(3)  | O18-Gd5-N15 | 72.6(4)  |
| O3-Gd2-O20  | 66.9(3)  | O18-Gd5-O7  | 148.1(4) |
| O3-Gd2-O15  | 100.0(3) | O18-Gd5-O16 | 50.1(4)  |
| O3-Gd2-O13  | 142.0(3) | O4-Gd6-N19  | 126.0(3) |
| O3-Gd2-N3   | 128.8(3) | O7-Gd6-N19  | 150.8(4) |
| O3-Gd2-N1   | 119.9(4) | O7-Gd6-O4   | 81.0(3)  |
| O5-Gd2-O3   | 74.9(3)  | O7-Gd6-O31  | 143.5(3) |
| O5-Gd2-O11  | 78.3(3)  | O7-Gd6-O8   | 62.7(3)  |
| O5-Gd2-O19  | 68.1(3)  | O7-Gd6-O29  | 78.3(3)  |
| O5-Gd2-O6   | 61.5(3)  | O31-Gd6-N19 | 63.9(4)  |
| O5-Gd2-O20  | 130.3(3) | O31-Gd6-O4  | 73.3(3)  |
| O5-Gd2-O15  | 152.2(3) | O31-Gd6-O8  | 83.0(3)  |
| O5-Gd2-O13  | 116.2(3) | O31-Gd6-O29 | 99.4(3)  |
| O5-Gd2-N3   | 132.2(4) | O8-Gd6-N19  | 134.1(3) |
| O5-Gd2-N1   | 137.6(4) | O8-Gd6-O4   | 65.7(2)  |
| O11-Gd2-O3  | 71.0(3)  | O29-Gd6-N19 | 88.7(3)  |
| O11-Gd2-O19 | 115.9(3) | O29-Gd6-O4  | 130.8(3) |
| O11-Gd2-O6  | 129.8(3) | O29-Gd6-O8  | 65.1(2)  |
| O11-Gd2-O20 | 115.5(3) | O12-Gd6-N19 | 83.8(4)  |
| O11-Gd2-O15 | 74.3(3)  | O12-Gd6-O4  | 68.9(3)  |
| O11-Gd2-O13 | 75.8(3)  | O12-Gd6-O7  | 98.6(3)  |
| O11-Gd2-N3  | 143.8(4) | O12-Gd6-O31 | 95.8(3)  |
| O11-Gd2-N1  | 71.4(4)  | O12-Gd6-O8  | 132.9(3) |
| O19-Gd2-O3  | 139.2(3) | O12-Gd6-O29 | 158.0(3) |
| O19-Gd2-O6  | 77.1(3)  | O32-Gd6-N19 | 70.8(4)  |
| O19-Gd2-O20 | 128.1(3) | O32-Gd6-O4  | 141.3(4) |

|             |          |             |          |
|-------------|----------|-------------|----------|
| O19-Gd2-O15 | 120.8(3) | O32-Gd6-O7  | 80.9(4)  |
| O19-Gd2-O13 | 72.9(3)  | O32-Gd6-O31 | 134.7(4) |
| O19-Gd2-N3  | 71.1(4)  | O32-Gd6-O8  | 131.7(3) |
| O19-Gd2-N1  | 99.3(4)  | O32-Gd6-O29 | 77.7(4)  |
| O6-Gd2-O20  | 76.3(3)  | O32-Gd6-O12 | 80.3(4)  |
| O6-Gd2-O15  | 143.4(3) | O3-Gd7-O35  | 72.4(3)  |
| O6-Gd2-O13  | 147.5(3) | O3-Gd7-N23  | 134.0(3) |
| O6-Gd2-N3   | 86.1(3)  | O4-Gd7-O3   | 70.0(3)  |
| O6-Gd2-N1   | 158.1(4) | O4-Gd7-O35  | 137.2(3) |
| O20-Gd2-O15 | 67.7(3)  | O4-Gd7-N23  | 155.9(3) |
| O20-Gd2-O13 | 113.5(4) | O11-Gd7-O3  | 72.5(3)  |
| O20-Gd2-N3  | 63.4(4)  | O11-Gd7-O4  | 102.3(3) |
| O20-Gd2-N1  | 89.9(4)  | O11-Gd7-O35 | 84.9(3)  |
| O15-Gd2-N3  | 72.5(4)  | O11-Gd7-N23 | 86.3(3)  |
| O15-Gd2-N1  | 24.5(4)  | O34-Gd7-O3  | 149.2(3) |
| O13-Gd2-O15 | 52.4(4)  | O34-Gd7-O4  | 84.9(3)  |
| O13-Gd2-N3  | 72.8(4)  | O34-Gd7-O11 | 96.8(3)  |
| O13-Gd2-N1  | 28.0(4)  | O34-Gd7-O12 | 96.6(4)  |
| N3-Gd2-N1   | 72.4(4)  | O34-Gd7-O35 | 136.8(3) |
| O1-Gd3-N7   | 126.3(3) | O34-Gd7-N23 | 71.7(4)  |
| O5-Gd3-O1   | 66.0(3)  | O12-Gd7-O3  | 92.8(3)  |
| O5-Gd3-N7   | 134.3(3) | O12-Gd7-O4  | 73.1(3)  |
| O19-Gd3-O1  | 130.6(3) | O12-Gd7-O11 | 165.3(3) |
| O19-Gd3-O5  | 64.8(3)  | O12-Gd7-O35 | 89.3(3)  |
| O19-Gd3-O23 | 99.9(3)  | O12-Gd7-N23 | 103.6(4) |
| O19-Gd3-N7  | 87.1(3)  | O35-Gd7-N23 | 65.2(3)  |

**Table S3.** The results of coordination geometric configurations evaluated by SHAPE software for seven-coordinated Gd of complex **1**.

| Label   | Symmetry | Geometric configuration                    | Deviation parameters |                    |
|---------|----------|--------------------------------------------|----------------------|--------------------|
|         |          |                                            | Gd4/ Gd11/<br>Gd18   | Gd7/ Gd14/<br>Gd21 |
| HP-7    | $D_{7h}$ | Heptagon                                   | 30.083               | 29.939             |
| HPY-7   | $C_{6v}$ | Hexagonal pyramid                          | 23.138               | 22.557             |
| PBPY-7  | $D_{5h}$ | Pentagonal bipyramid                       | 1.790                | 1.786              |
| COC-7   | $C_{3v}$ | Capped octahedron                          | 6.817                | 7.051              |
| CTPR-7  | $C_{2v}$ | Capped trigonal prism                      | 5.126                | 5.191              |
| JPBPY-7 | $D_{5h}$ | Johnson pentagonal<br>bipyramid J13        | 4.821                | 4.724              |
| JETPY-7 | $C_{3v}$ | Johnson elongated<br>triangular pyramid J7 | 20.196               | 20.232             |

**Table S4.** The results of coordination geometric configurations evaluated by SHAPE software for eight-coordinated Gd of complex **1**.

| Label        | Symmetry | Geometric configuration                       | Deviation parameters |                       |                       |
|--------------|----------|-----------------------------------------------|----------------------|-----------------------|-----------------------|
|              |          |                                               | Gd1/ Gd8/<br>Gd15    | Gd3/<br>Gd10/<br>Gd17 | Gd6/<br>Gd13/<br>Gd20 |
| OP-8         | $D_{8h}$ | Octagon                                       | 24.291               | 29.216                | 29.763                |
| HPY-8        | $C_{7v}$ | Heptagonal pyramid                            | 23.533               | 21.322                | 21.308                |
| HBPY-8       | $D_{6h}$ | Hexagonal bipyramid                           | 15.298               | 13.95                 | 13.85                 |
| CU-8         | $O_h$    | Cube                                          | 8.06                 | 13.38                 | 12.845                |
| SAPR-8       | $D_{4d}$ | Square antiprism                              | 1.557                | 4.307                 | 4.746                 |
| TDD-8        | $D_{2d}$ | Triangular dodecahedron                       | 1.637                | 2.021                 | 2.205                 |
| JGBF-8       | $D_{2d}$ | Johnson gyrobifastigium<br>J26                | 15.892               | 10.603                | 10.637                |
| JETBPY-<br>8 | $D_{3h}$ | Johnson elongated<br>triangular bipyramid J14 | 26.08                | 28.05                 | 27.386                |
| JBTPR-8      | $C_{2v}$ | Biaugmented trigonal prism<br>J50             | 3.438                | 3.688                 | 3.5                   |
| BTPR-8       | $C_{2v}$ | Biaugmented trigonal prism                    | 2.762                | 2.858                 | 2.647                 |
| JSD-8        | $D_{2d}$ | Snub diphonoid J84                            | 4.648                | 3.209                 | 3.206                 |
| TT-8         | $T_d$    | Triakis tetrahedron                           | 8.771                | 14.161                | 13.612                |
| ETBPY-<br>8  | $D_{3h}$ | Elongated trigonal<br>bipyramid               | 22.355               | 23.536                | 23.367                |



**Table S5.** The results of coordination geometric configurations evaluated by SHAPE software for nine-coordinated Gd of complex **1**.

| Label        | Symmetry | Geometric configuration               | Deviation parameters |                    |
|--------------|----------|---------------------------------------|----------------------|--------------------|
|              |          |                                       | Gd2/ Gd9/<br>Gd16    | Gd5/ Gd12/<br>Gd19 |
| EP-9         | $D_{9h}$ | Enneagon                              | 34.845               | 34.29              |
| OPY-9        | $C_{8v}$ | Octagonal pyramid                     | 19.725               | 19.883             |
| HBPY-9       | $D_{7h}$ | Heptagonal bipyramid                  | 15.388               | 14.644             |
| JTC-9        | $C_{3v}$ | Johnson triangular cupola J3          | 16.003               | 15.539             |
| JCCU-9       | $C_{4v}$ | Capped cube J8                        | 10.032               | 10.077             |
| CCU-9        | $C_{4v}$ | Spherical-relaxed capped cube         | 8.328                | 8.205              |
| JCSAPR-<br>9 | $C_{4v}$ | Capped square antiprism J10           | 3.022                | 3.259              |
| CSAPR-9      | $C_{4v}$ | Spherical capped square<br>antiprism  | 1.813                | 1.907              |
| JTCTPR-<br>9 | $D_{3h}$ | Tricapped trigonal prism J51          | 4.779                | 5.11               |
| TCTPR-9      | $D_{3h}$ | Spherical tricapped trigonal<br>prism | 1.522                | 1.675              |
| JTDIC-9      | $C_{3v}$ | Tridiminshed icosahedron J63          | 11.697               | 12.214             |
| HH-9         | $C_{2v}$ | Hula-hoop                             | 11.282               | 10.745             |
| MFF-9        | $C_s$    | Muffin                                | 2.136                | 2.131              |

**Table S6.** Selected bond distances (Å) and bond angles (°) for complex **2**.

|                                                 |            |                                                 |            |
|-------------------------------------------------|------------|-------------------------------------------------|------------|
| Gd1-O25 ( $\mu_3$ -OH <sup>-</sup> )            | 2.320(7)   | Gd5-O22 ( $\mu_3$ -OH <sup>-</sup> )            | 2.292(8)   |
| Gd1-O25A ( $\mu_3$ -OH <sup>-</sup> )           | 2.369(8)   | Gd5-O22B ( $\mu_3$ -OH <sup>-</sup> )           | 2.391(7)   |
| Gd1-O1 ( $\mu_2$ -phO <sup>-</sup> )            | 2.340(8)   | Gd5-O4 ( $\mu_2$ -phO <sup>-</sup> )            | 2.329(9)   |
| Gd1-O1B ( $\mu_2$ -phO <sup>-</sup> )           | 2.403(9)   | Gd5-O4A ( $\mu_2$ -phO <sup>-</sup> )           | 2.426(9)   |
| Gd1-O24 ( $\mu_4$ -O <sup>2-</sup> )            | 2.484(15)  | Gd5-O20 ( $\mu_4$ -O <sup>2-</sup> )            | 2.5462(15) |
| Gd1-O2 (acyl oxygen)                            | 2.439(8)   | Gd5-O5 (acyl oxygen)                            | 2.452(8)   |
| Gd1-O7 (nitrate)                                | 2.5316(14) | Gd5-O10 (nitrate)                               | 2.511(14)  |
| Gd1-O8 (nitrate)                                | 2.579(11)  | Gd5-O11 (nitrate)                               | 2.566(16)  |
| Gd1-N1                                          | 2.587(19)  | Gd5-N5                                          | 2.601(11)  |
| Gd1-Gd1A                                        | 3.5669(11) | Gd5---Gd5A                                      | 3.5828(12) |
|                                                 |            | Gd5---Gd4                                       | 3.882(1)   |
|                                                 |            |                                                 |            |
| Gd2-O23 ( $\mu_3$ -OH <sup>-</sup> ) $\times$ 4 | 2.434(9)   | Gd4-O21 ( $\mu_3$ -OH <sup>-</sup> ) $\times$ 4 | 2.454(8)   |
| Gd2-O25 ( $\mu_3$ -OH <sup>-</sup> ) $\times$ 4 | 2.494(7)   | Gd4-O22 ( $\mu_3$ -OH <sup>-</sup> ) $\times$ 4 | 2.511(8)   |
| Gd2-O19 ( $\mu_6$ -O <sup>2-</sup> )            | 2.617(13)  | Gd4-O19 ( $\mu_6$ -O <sup>2-</sup> )            | 2.716(13)  |
| Gd2---Gd1                                       | 3.873(1)   | Gd4---Gd3                                       | 3.6500(10) |
|                                                 |            |                                                 |            |
| Gd3-O21 ( $\mu_3$ -OH <sup>-</sup> )            | 2.335(8)   | Gd3-O14 (nitrate)                               | 2.475(11)  |
| Gd3-O21B ( $\mu_3$ -OH <sup>-</sup> )           | 2.383(7)   | Gd3-O13 (nitrate)                               | 2.551(9)   |
| Gd3-O23 ( $\mu_3$ -OH <sup>-</sup> )            | 2.335(8)   | Gd3-O17 (nitrate)                               | 2.485(11)  |
| Gd3-O23A ( $\mu_3$ -OH <sup>-</sup> )           | 2.391(8)   | Gd3-O16 (nitrate)                               | 2.555(9)   |
| Gd3-O19 ( $\mu_6$ -O <sup>2-</sup> )            | 2.4822(8)  | Gd3---Gd3A                                      | 3.5099(11) |
| Gd2---Gd3                                       | 3.6355(10) |                                                 |            |
|                                                 |            |                                                 |            |
| Gd1-O1-Gd1A                                     | 97.5(3)    | Gd5-O4-Gd5B                                     | 97.8(3)    |
| Gd2-O19-Gd3                                     | 90.9(3)    | Gd3-O19-Gd3A                                    | 89.983(10) |
| Gd2-O19-Gd4                                     | 180.0      | Gd3-O19-Gd3C                                    | 178.2(6)   |
| Gd3-O19-Gd4                                     | 89.1(3)    | Gd1-O25-Gd1B                                    | 99.0(3)    |
| Gd1-O25-Gd2                                     | 107.1(3)   | Gd1-O25-Gd2B                                    | 105.6(3)   |
| Gd2-O23-Gd3                                     | 99.3(3)    | Gd2-O23-Gd3B                                    | 97.8(3)    |
| Gd3-O23-Gd3B                                    | 95.9(3)    | Gd5-O22-Gd5A                                    | 99.8(2)    |
| Gd4-O22-Gd5                                     | 107.8(4)   | Gd4-O22-Gd5A                                    | 104.7(3)   |
| Gd3-O21-Gd3A                                    | 96.1(3)    | Gd3-O21-Gd4                                     | 99.3(3)    |
| Gd3A-O21-Gd4                                    | 98.0(3)    |                                                 |            |
| Gd1-O24-Gd1C                                    | 170.1(6)   | Gd5-O20-Gd5C                                    | 168.5(5)   |
| Gd1-O24-Gd1A                                    | 89.57(5)   | Gd5-O20-Gd5A                                    | 89.43(5)   |

Symmetry codes: A y, -x+1/2, z; B -y+1/2, x, z; C -x+1/2, -y+1/2, z.

**Table S7.** The results of coordination geometric configurations evaluated by SHAPE software for nine-coordinated Gd of complex **2**.

| Label    | Symmetry | Geometric configuration            | Deviation parameters |        |        |        |        |
|----------|----------|------------------------------------|----------------------|--------|--------|--------|--------|
|          |          |                                    | Gd1                  | Gd2    | Gd3    | Gd4    | Gd5    |
| EP-9     | $D_{9h}$ | Enneagon                           | 31.039               | 36.92  | 30.122 | 36.567 | 30.963 |
| OPY-9    | $C_{8v}$ | Octagonal pyramid                  | 21.347               | 23.495 | 22.334 | 23.443 | 20.693 |
| HBPY-9   | $D_{7h}$ | Heptagonal bipyramid               | 16.51                | 20.785 | 18.68  | 20.74  | 16.975 |
| JTC-9    | $C_{3v}$ | Johnson triangular cupola J3       | 11.838               | 17.003 | 13.64  | 16.85  | 11.913 |
| JCCU-9   | $C_{4v}$ | Capped cube J8                     | 5.597                | 9.803  | 7.653  | 9.338  | 6.049  |
| CCU-9    | $C_{4v}$ | Spherical-relaxed capped cube      | 5.015                | 9.476  | 6.933  | 9.324  | 5.493  |
| JCSAPR-9 | $C_{4v}$ | Capped square antiprism J10        | 2.621                | 0.617  | 2.571  | 0.456  | 2.41   |
| CSAPR-9  | $C_{4v}$ | Spherical capped square antiprism  | 2.164                | 0.326  | 1.905  | 0.444  | 1.96   |
| JTCTPR-9 | $D_{3h}$ | Tricapped trigonal prism J51       | 3.354                | 2.709  | 2.491  | 2.579  | 3.481  |
| TCTPR-9  | $D_{3h}$ | Spherical tricapped trigonal prism | 3.552                | 1.626  | 2.642  | 1.768  | 3.356  |
| JTDIC-9  | $C_{3v}$ | Tridiminished icosahedron J63      | 13.365               | 14.426 | 13.842 | 14.522 | 13.466 |
| HH-9     | $C_{2v}$ | Hula-hoop                          | 9.575                | 13.059 | 11.579 | 13.146 | 10.582 |
| MFF-9    | $C_s$    | Muffin                             | 2.419                | 1.213  | 1.859  | 1.334  | 2.157  |

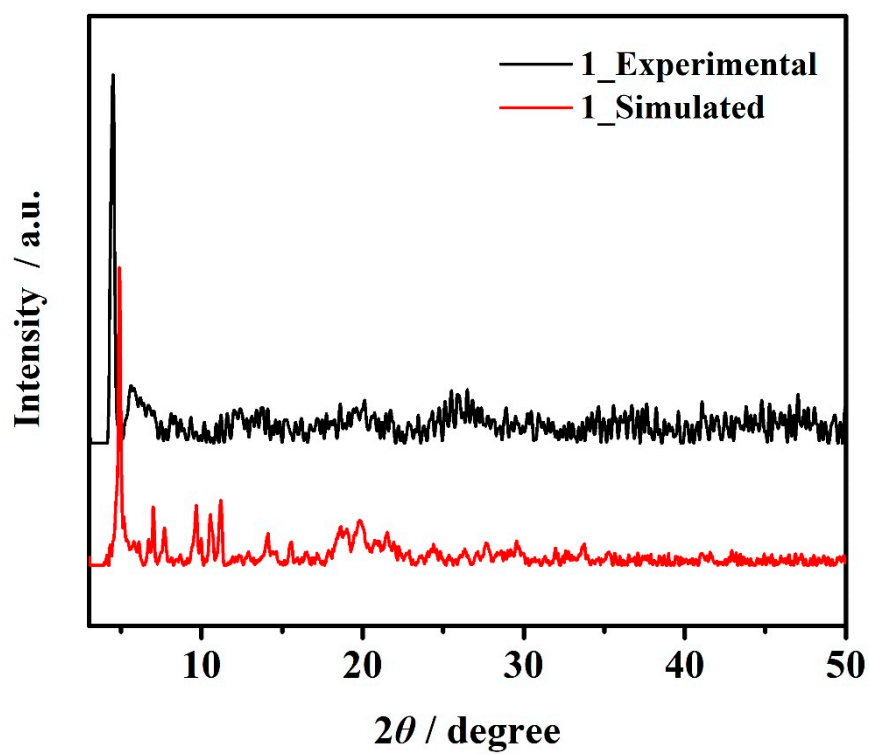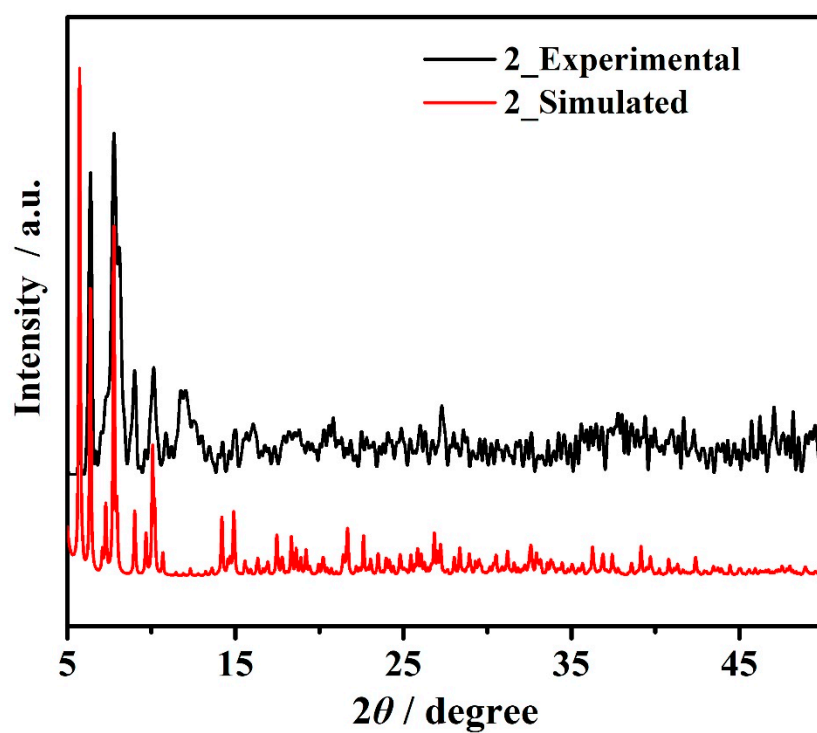

Figure S1. Powder diffraction pattern of complexes 1 and 2.

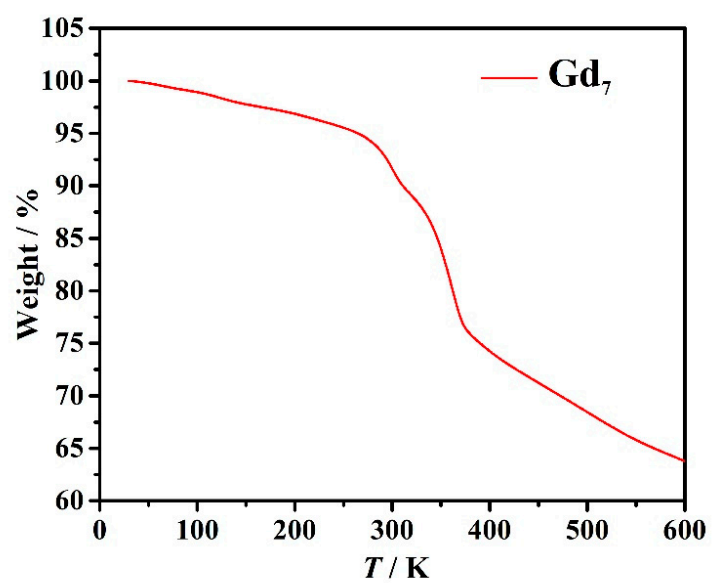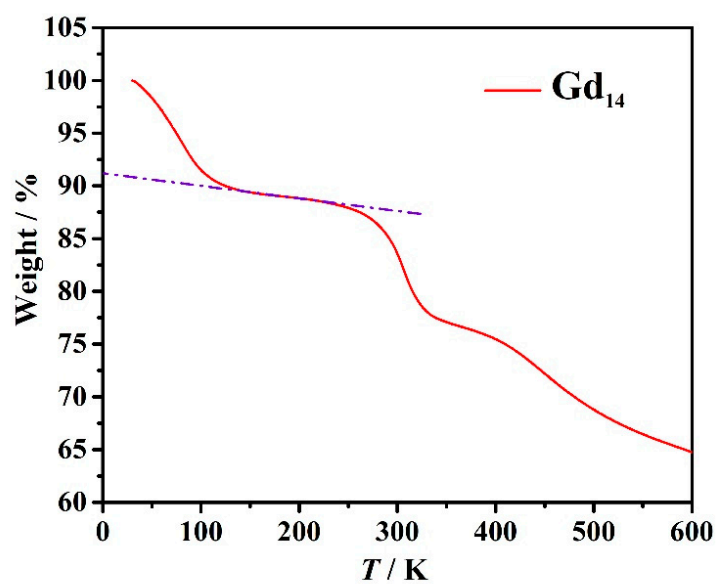

**Figure S2.** Thermogravimetric analysis of complexes **1** and **2**.

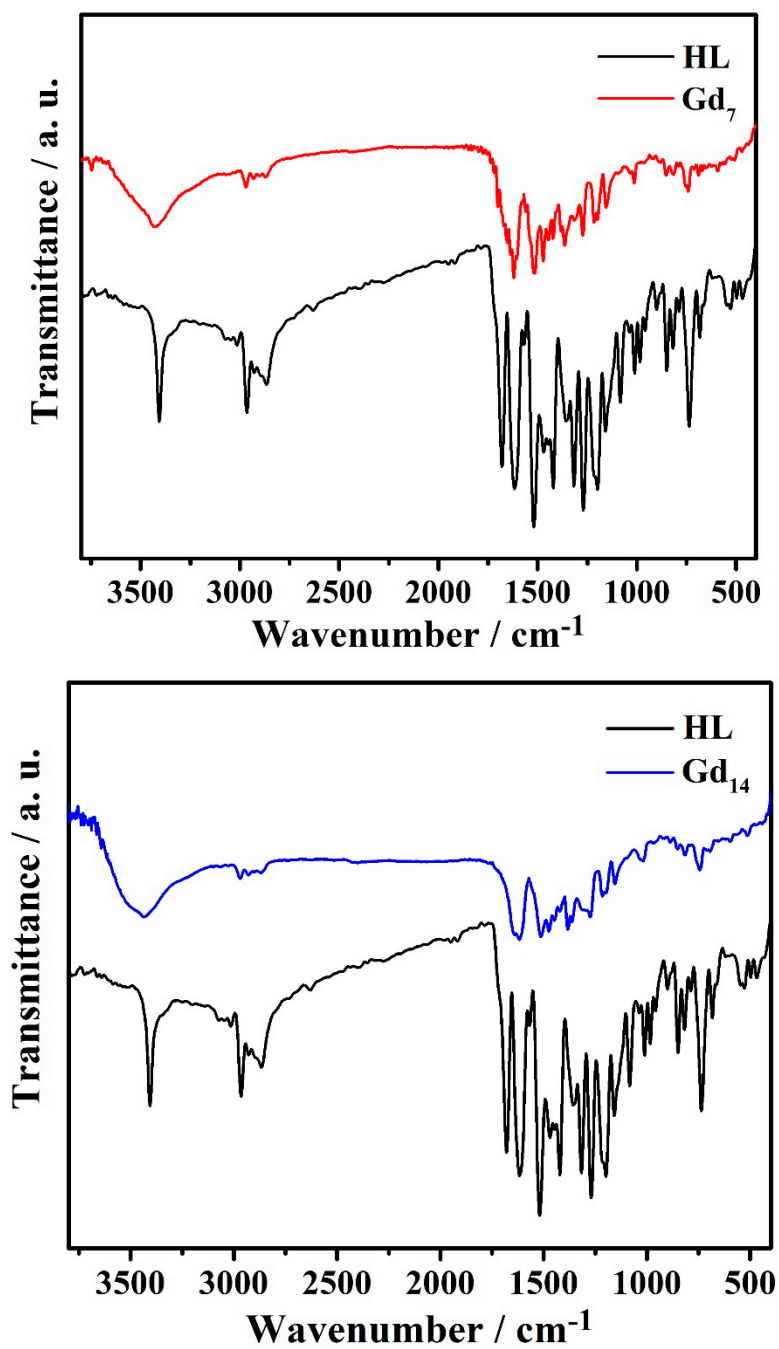

**Figure S3.** IR spectra of HL, complexes **1** and **2**.

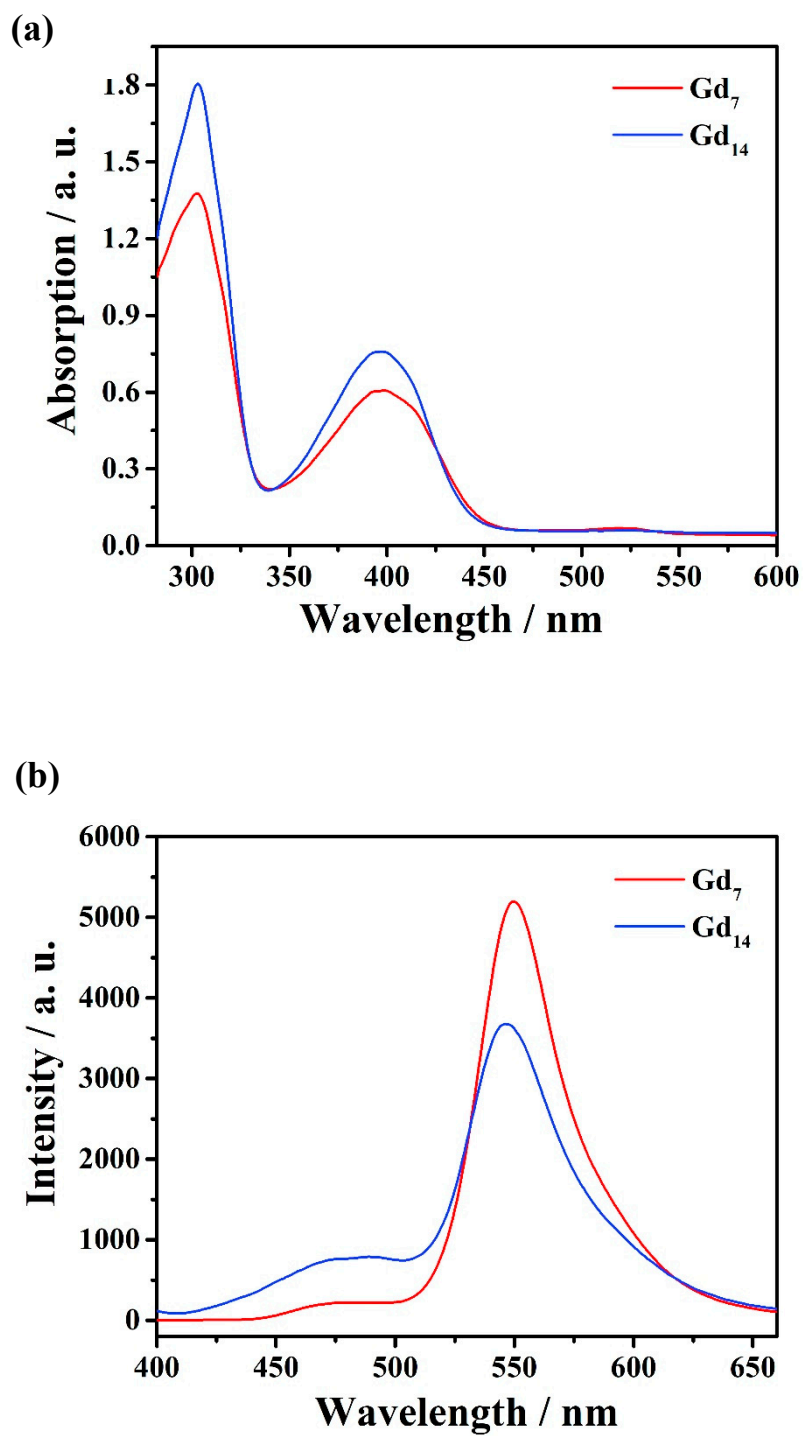

**Figure S4.** UV-vis (a) and fluorescence spectra ( $\lambda_{\text{ex}} = 354$  nm, b) for complexes  $Gd_7$  (1) and  $Gd_{14}$  (2) in MeOH (10  $\mu M$ ).

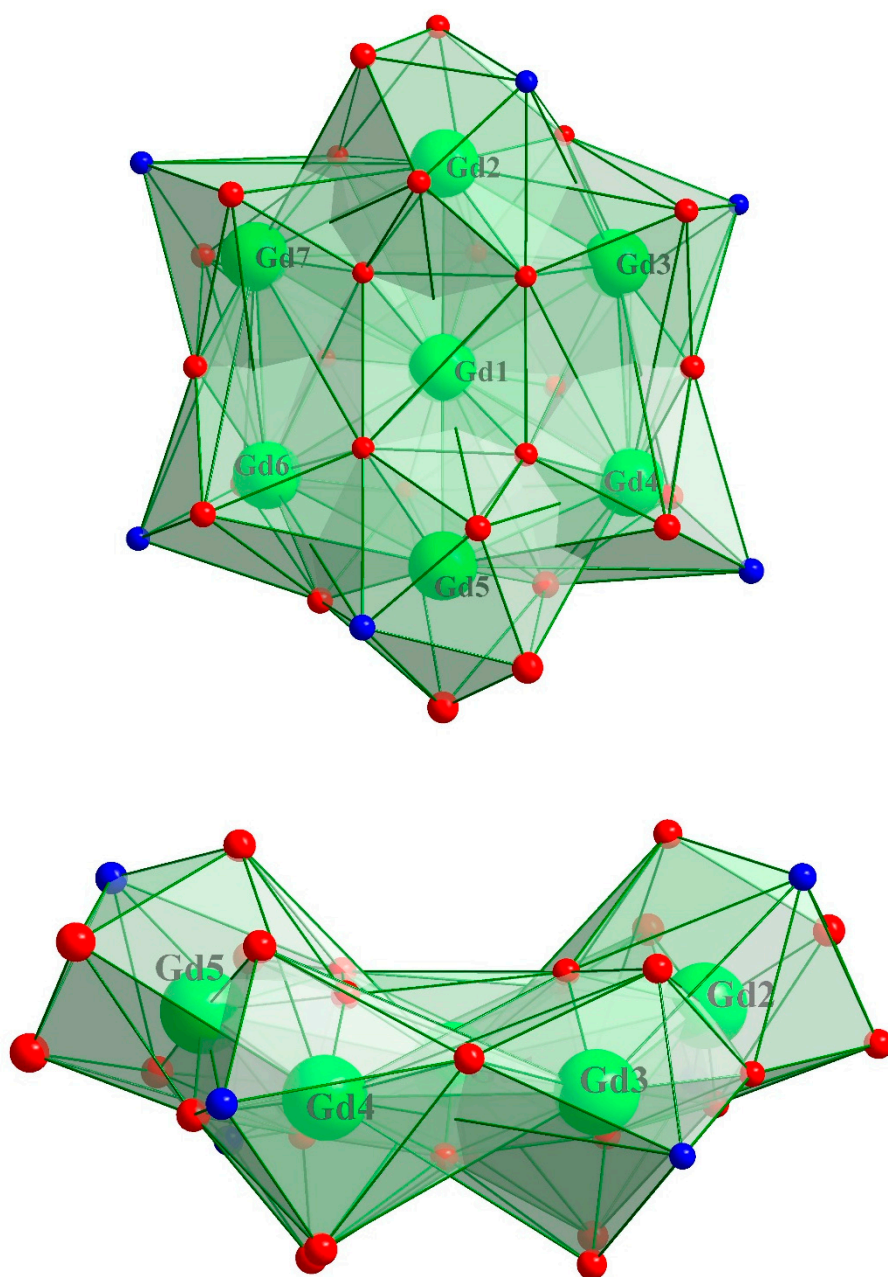

**Figure S5.** Top and side view of the heptanuclear surrounding polyhedral structures for complex **1**.



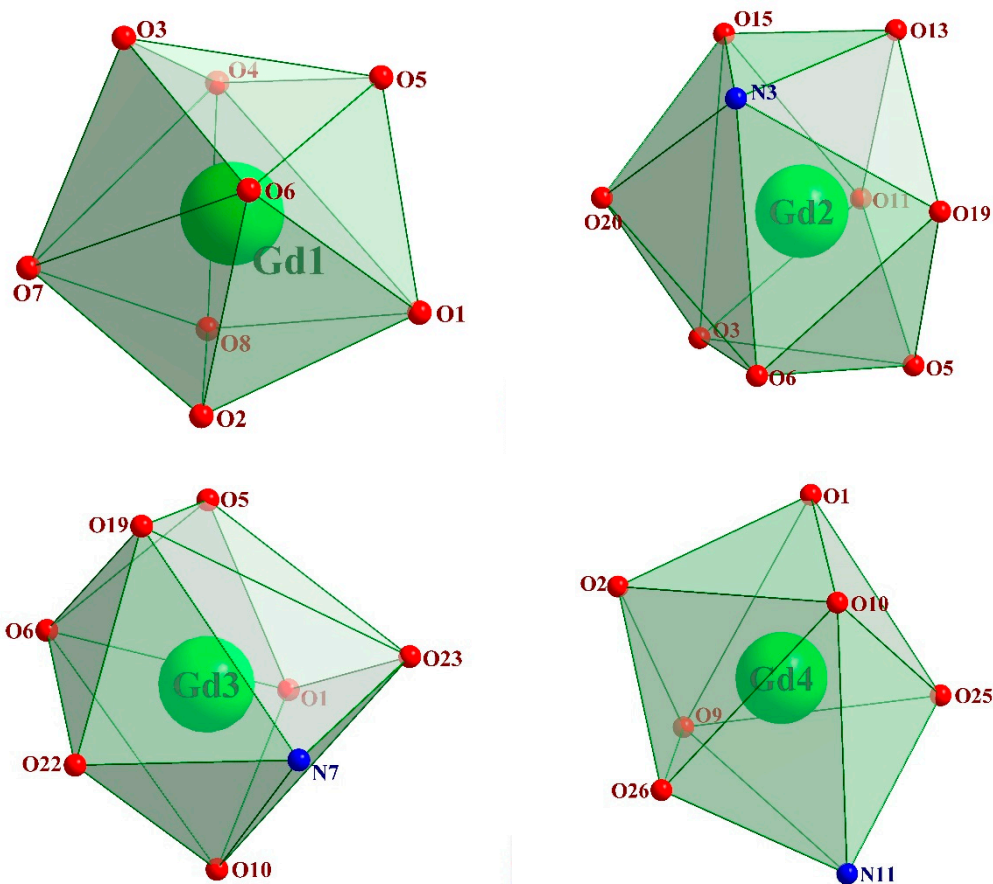

**Figure S6.** The coordinate lanthanide  $\text{Gd}^{\text{III}}$  surrounding polyhedral structures for complex **1**.

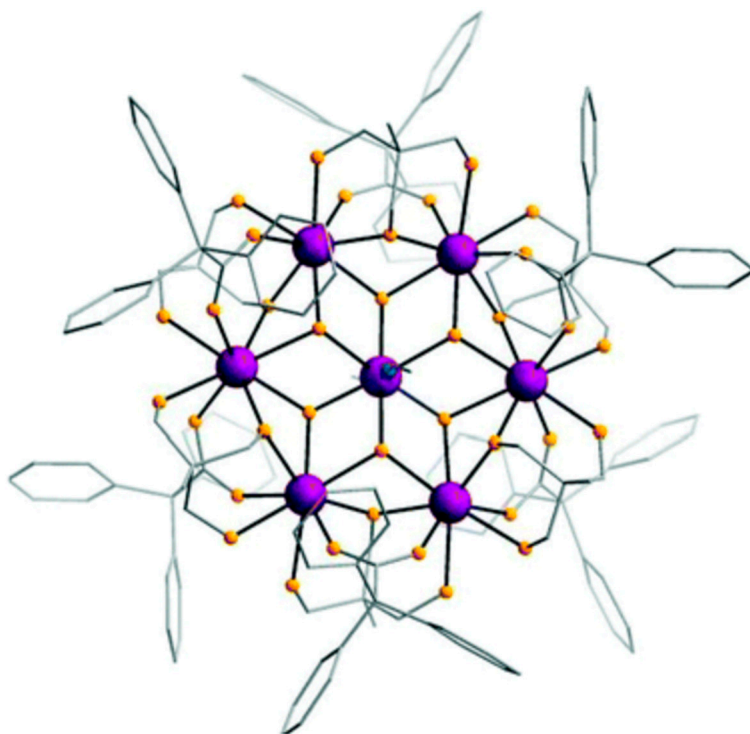

**Figure S7.** Structure of  $[\text{Gd}_7(\text{OH})_6(\text{thmeH}_2)_5(\text{thmeH})(\text{tpa})_6(\text{MeCN})_2]^{2+}$  (Gd (purple), O (yellow), N (blue), C (skeletal). H atoms are not shown). *Chem. Commun.* **2011**, 47, 7650-7652. <https://doi.org/10.1039/c1cc12252e>.

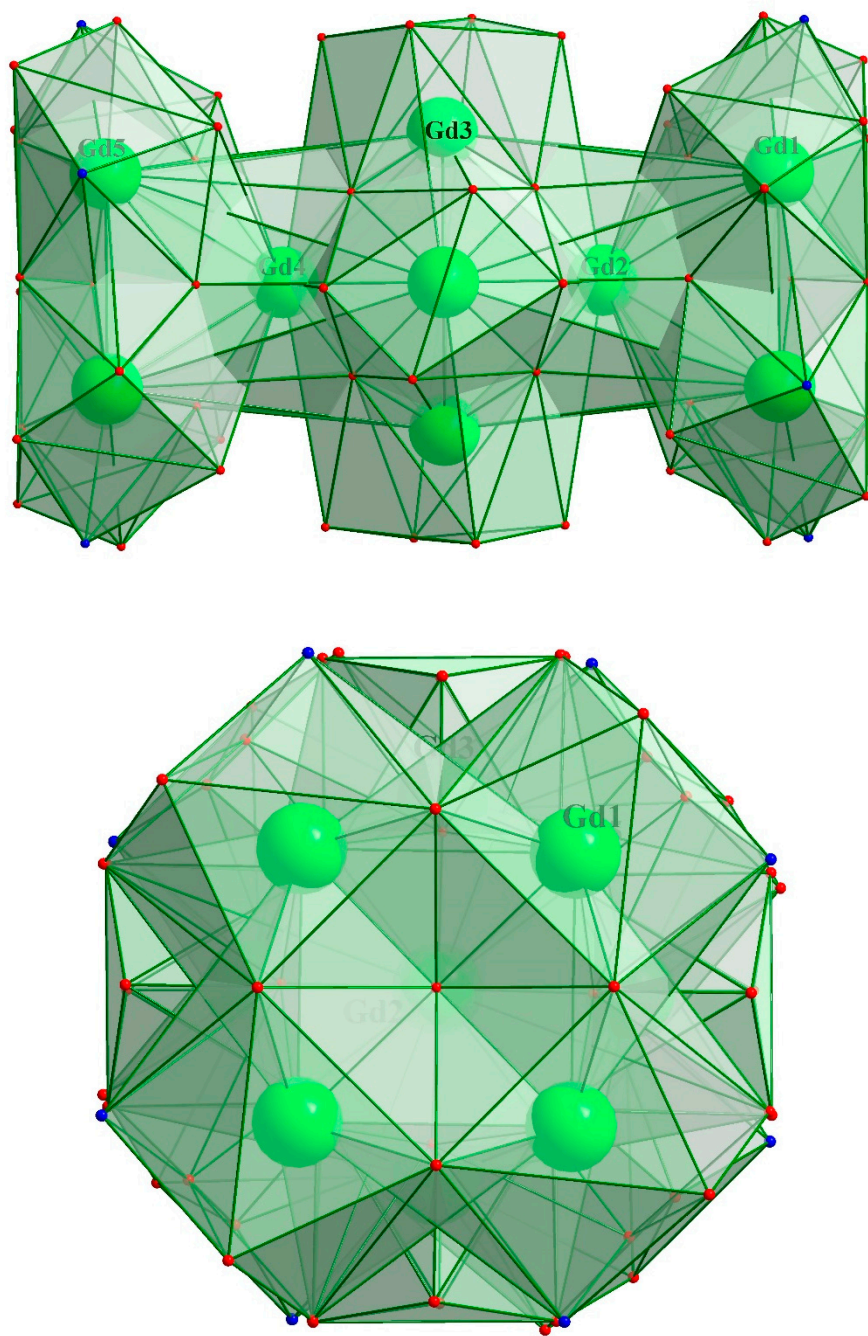

**Figure S8.** Drawings of the tetradecanuclear surrounding polyhedral structures for complex **2**.

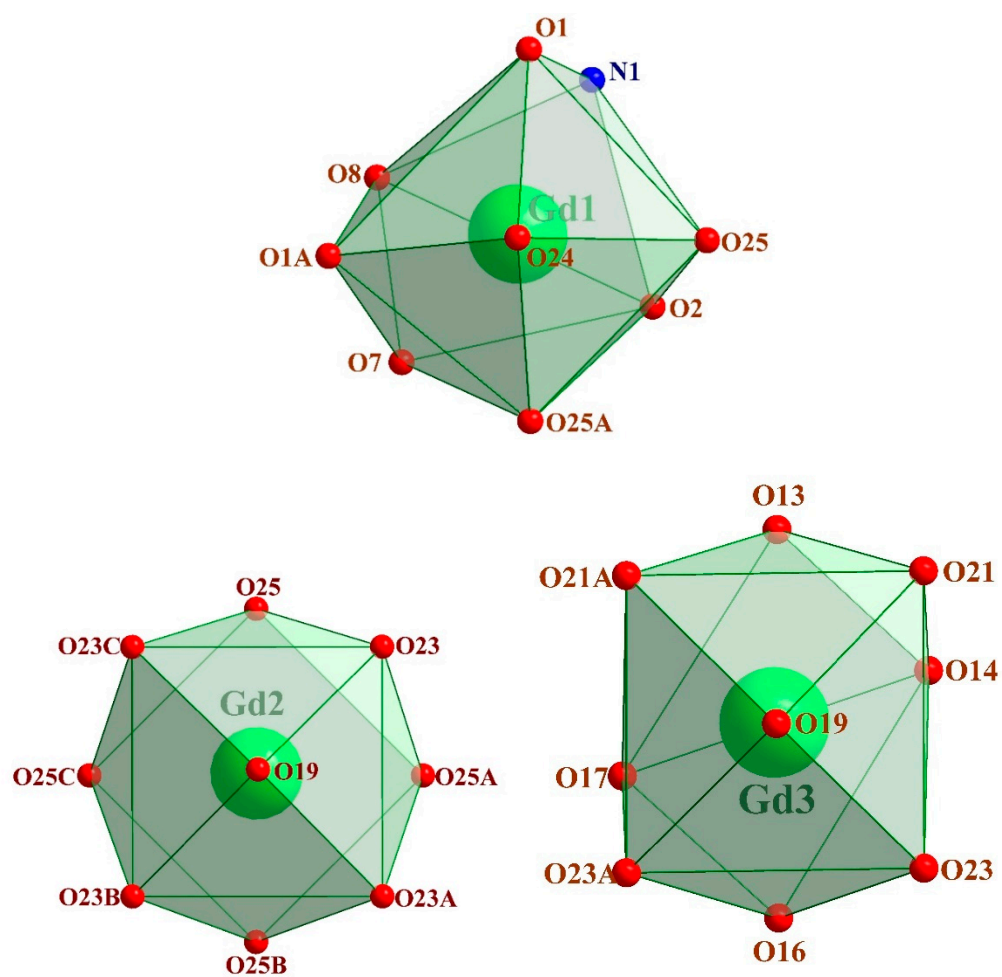

**Figure S9.** Drawings of the coordinate lanthanide  $\text{Gd}^{\text{III}}$  surrounding polyhedral structures for complex **2**.

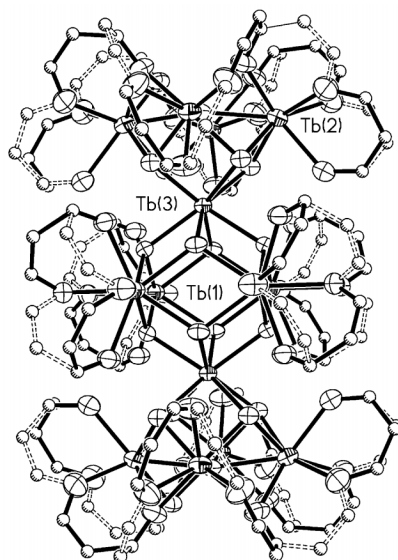

**Figure S10.** The molecular structure of  $\text{Ln}_{14}(\mu_4\text{-OH})_2(\mu_3\text{-OH})_{16}(\mu\text{-}\eta^2\text{-acac})_8(\eta^2\text{-acac})_{16}$  (Ln = Tb and Eu, acac<sup>-</sup> = acetylacetonato).

*Chem. Commun.* **2002**, 368-369. <https://doi.org/10.1039/b105969f>.

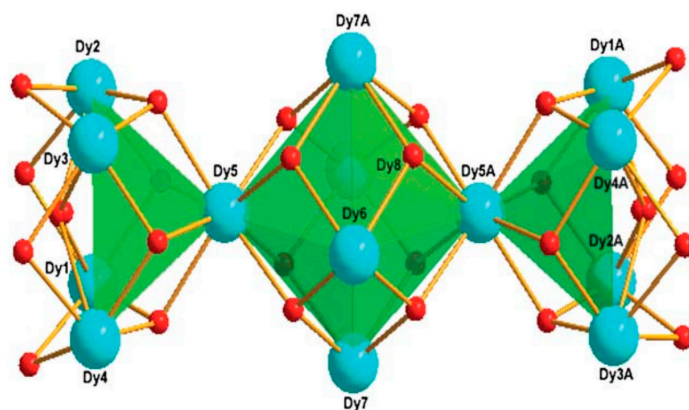

**Figure S11.** Polyhedral representation of the structure of  $\text{Ln}_{14}(\mu_4\text{-OH})_2(\mu_3\text{-OH})_{16}(\mu\text{-}\eta^2\text{-acac})_8(\eta^2\text{-acac})_{16} \cdot 6\text{H}_2\text{O}$  (Ln = Dy and Tb) cluster core.

*CrystEngComm* **2011**, *13*, 3643-3645. <https://doi.org/10.1039/c0ce00826e>

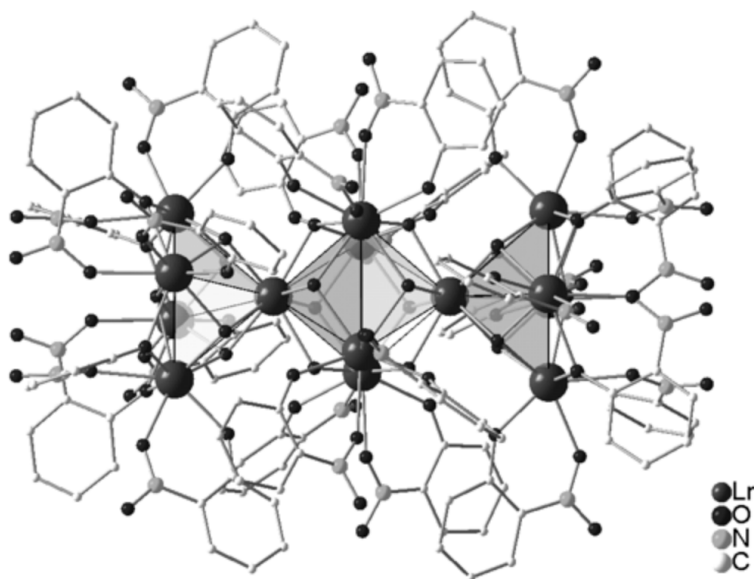

**Figure S12.** Solid-state structure of  $\text{H}_{18}[\text{Ln}_{14}(\mu\text{-}\eta^2\text{-o-O}_2\text{N-C}_6\text{H}_4\text{-O})_8(\eta^2\text{-o-O}_2\text{N-C}_6\text{H}_4\text{-O})_{16}(\mu_4\text{-O})_2(\mu_3\text{-O})_{16}]$  ( $\text{Ln} = \text{Dy, Er, Tm, Yb}$ ;  $\text{o-O}_2\text{N-C}_6\text{H}_4\text{-O} = \text{o-nitrophenolate}$ ) showing the atom labeling scheme, omitting hydrogen atoms.

*J. Am. Chem. Soc.* **2004**, *126*, 5213-5218. <https://doi.org/10.1021/ja0396044>.

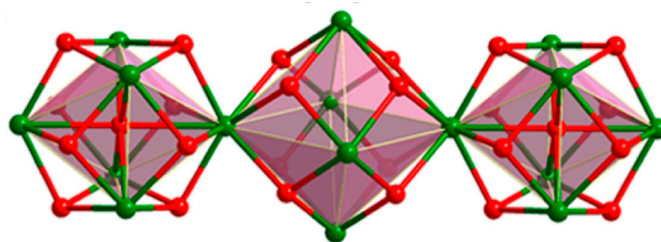

**Figure S13.** Polyhedron view of the  $[\text{Eu}_{16}(\text{tfac})_{20}(\text{CH}_3\text{OH})_8(\mu_3\text{-OH})_{24}(\mu_6\text{-O})_2]$  cluster where ligands have been removed for clarity.

*J. Am. Chem. Soc.* **2022**, *144*, 5653-5660. <https://doi.org/10.1021/jacs.2c01502>.



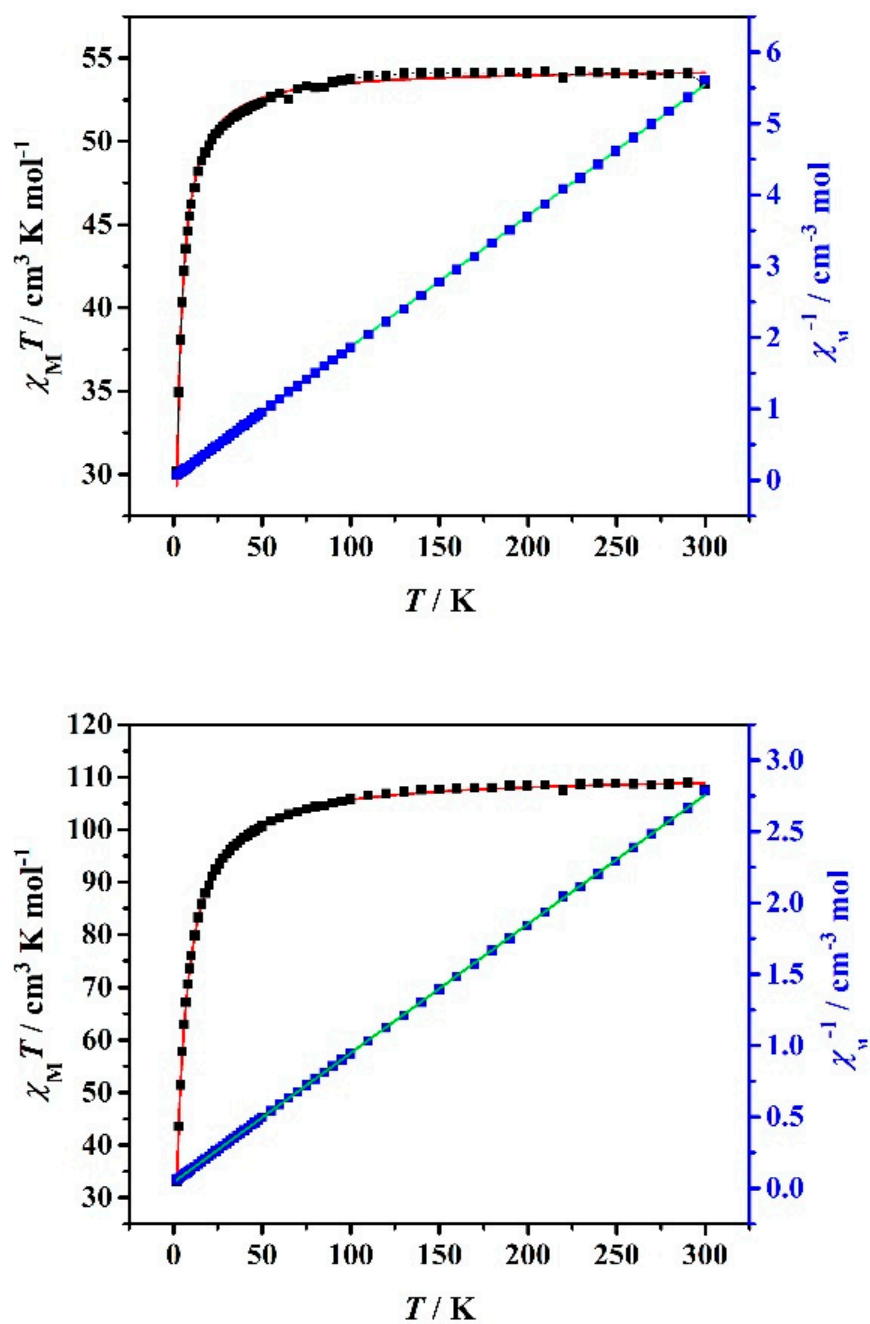

**Figure S14.** Temperature dependence of  $\chi_M T$  for **1**(up) and **2**(bottom) under a 1000-Oe magnetic field in the range of 2–300 K. The solid curves represent the Curie-Weiss fit results.

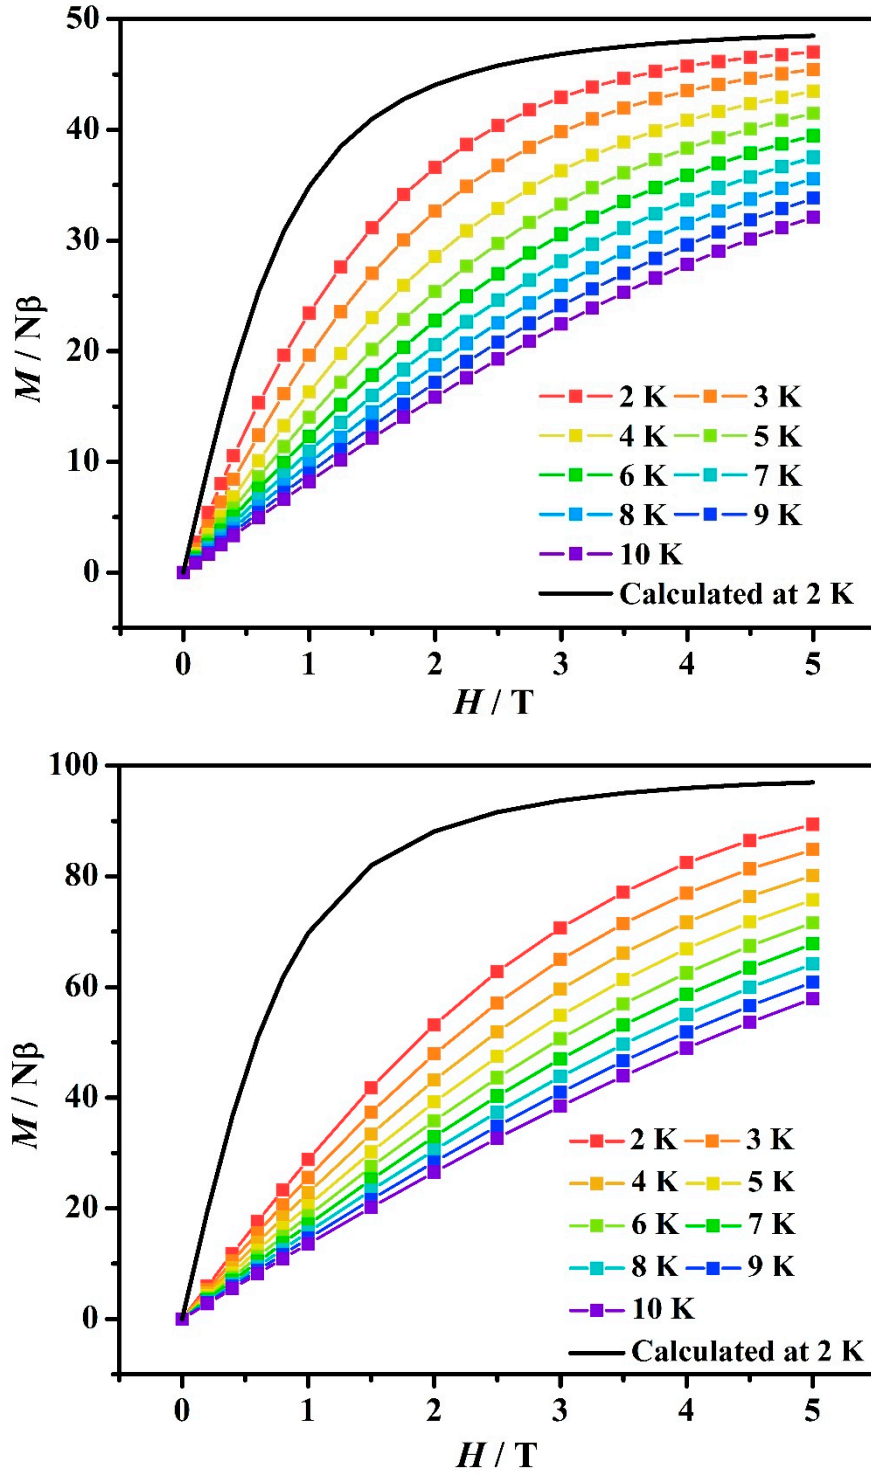

**Figure S15.** Field-dependence of the magnetization for 1(up) and 2(bottom) in the range of 2–10 K at 0 - 5 T. The solid curves represent the calculated Brillouin values for non-interacting  $S_{Gd}$  spins at 2 K.



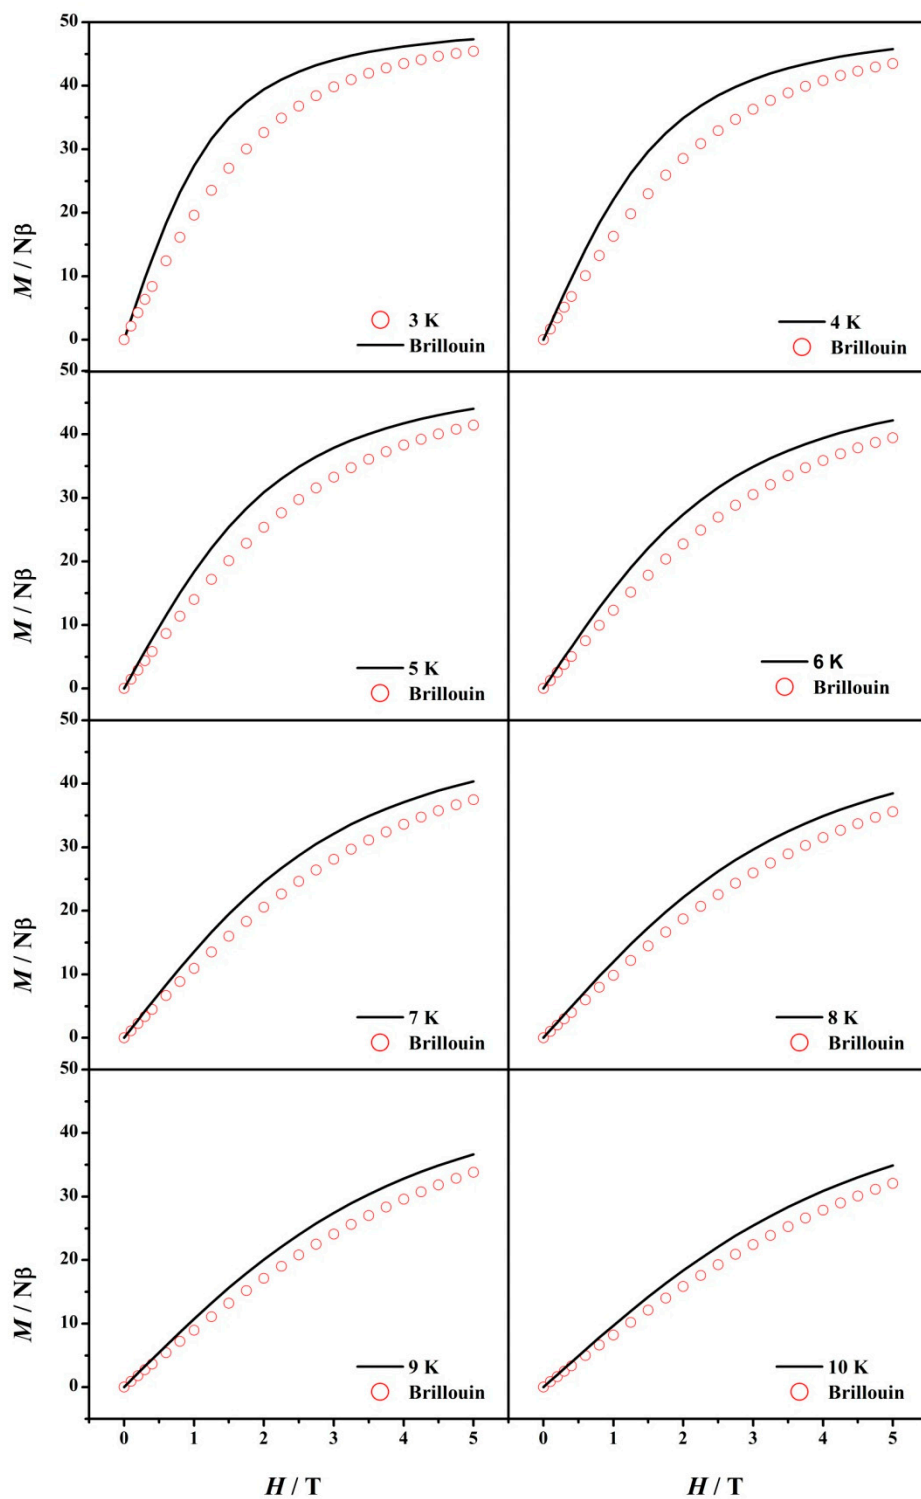

**Figure S16.** Field-dependence of the magnetization for **1** (Gd<sub>7</sub>) in the range of 3–10 K. The solid curves represent the calculated Brillouin values for non-interacting  $S_{\text{Gd}}$  spins in the range of 3–10 K, respectively.

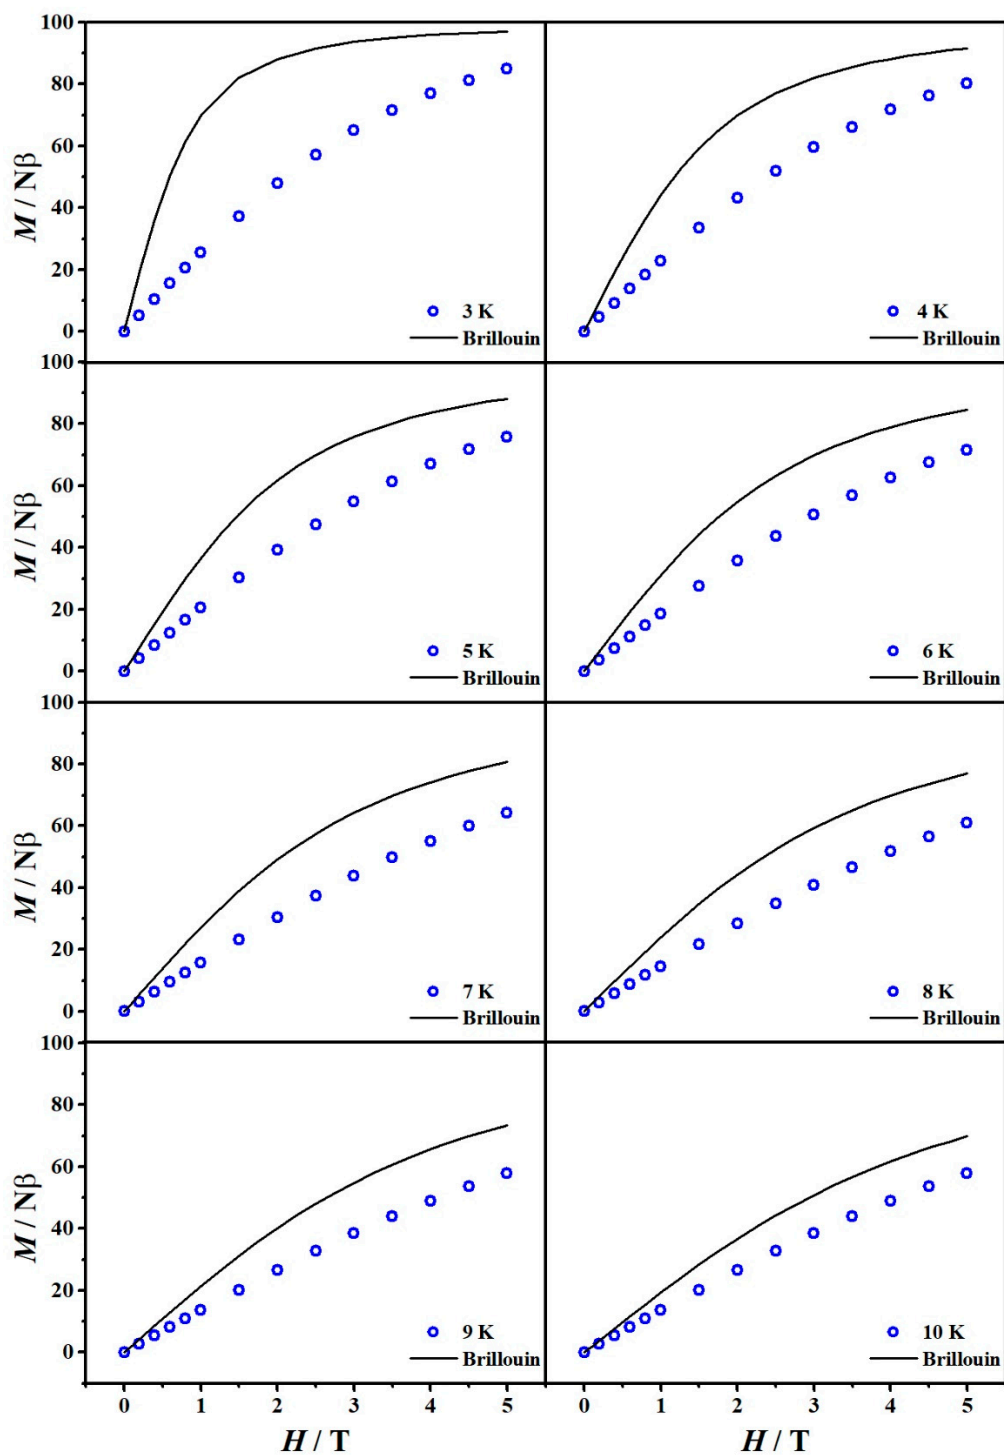

**Figure S17.** Field-dependence of the magnetization for **2** ( $\text{Gd}_{14}$ ) in the range of 3–10 K at 0 - 5 T. The solid curves represent the calculated Brillouin values for non-interacting  $S_{\text{Gd}}$  spins in the range of 3–10 K, respectively.
